# Supplementary material
Source: Royal Society of Chemistry journal article supplement (doi:10.1039/d6ay00700g)
Supplement: d6ay00700g1.pdf [file d6ay00700g1.pdf]

## Supporting Information

### **Responsive red carbon dots with dual-wavelength emission for anti-counterfeiting**

Jingjing Chen,<sup>a†</sup> Kaiqing Wu,<sup>a†\*</sup> Mengyi Xi,<sup>a</sup> Jinpeng Cai,<sup>a</sup> Ran Chen,<sup>a\*</sup> Yanfei Shen,<sup>b</sup> Songqin Liu,<sup>a</sup> Yuanjian Zhang<sup>a\*</sup>

<sup>a</sup> *Jiangsu Engineering Center of Smart Carbon-Rich Materials and Device, School of Chemistry and Chemical Engineering, Southeast University, Nanjing 211189, China, E-mail: [Kaiqing.Wu@seu.edu.cn](mailto:Kaiqing.Wu@seu.edu.cn); [rchen@seu.edu.cn](mailto:rchen@seu.edu.cn) [Yuanjian.Zhang@seu.edu.cn](mailto:Yuanjian.Zhang@seu.edu.cn).*

<sup>b</sup> *Center of Clinical Laboratory Medicine, Zhongda Hospital, and Jiangsu Provincial Key Laboratory of Critical Care Medicine, Medical School, Southeast University, Nanjing 210009, China.*

† These authors contributed equally to the work.

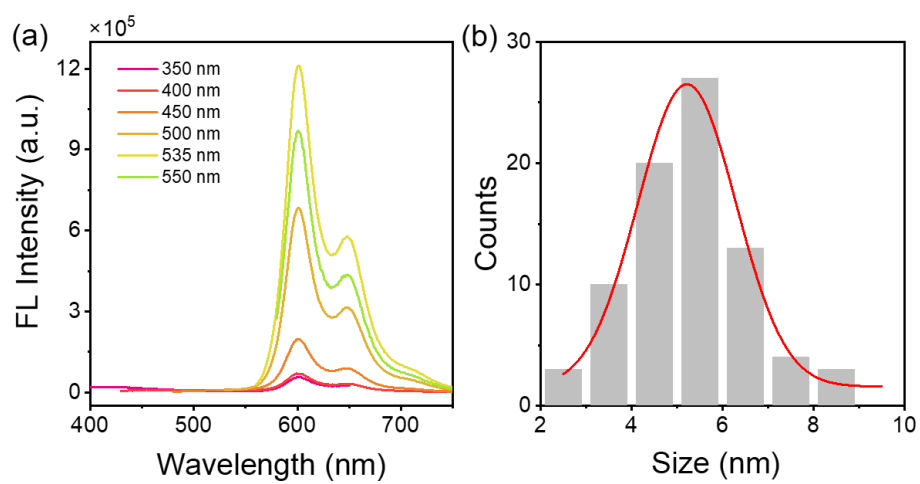

**Fig. S1** (a) Fluorescence emission spectra of R-CDs at different excitation wavelengths. (b) Particle size distribution diagrams of R-CDs

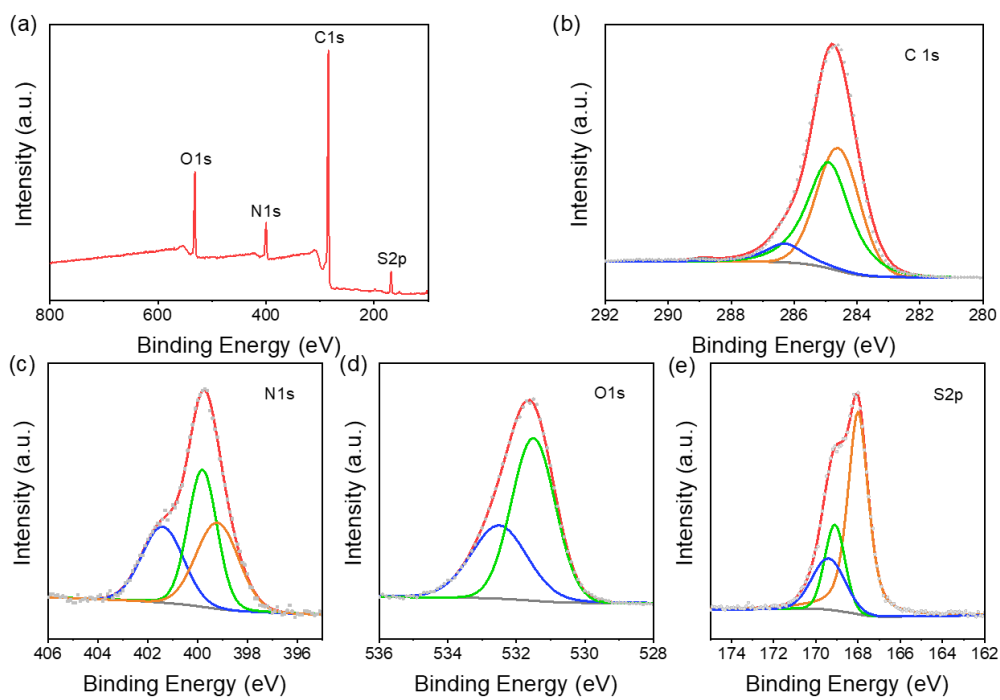

**Fig. S2** (a) XPS survey spectra, high-resolution (b) C 1s XPS spectra, (c) N 1s XPS spectra, (d) O 1s XPS spectra and (e) S 2s XPS spectra of R-CDs.

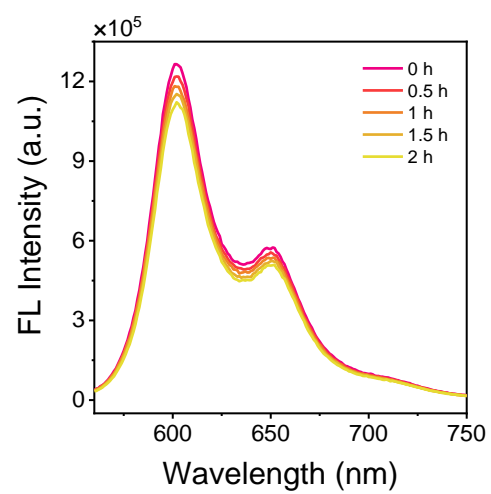

**Fig. S3** Stability of R-CDs under UV irradiation.

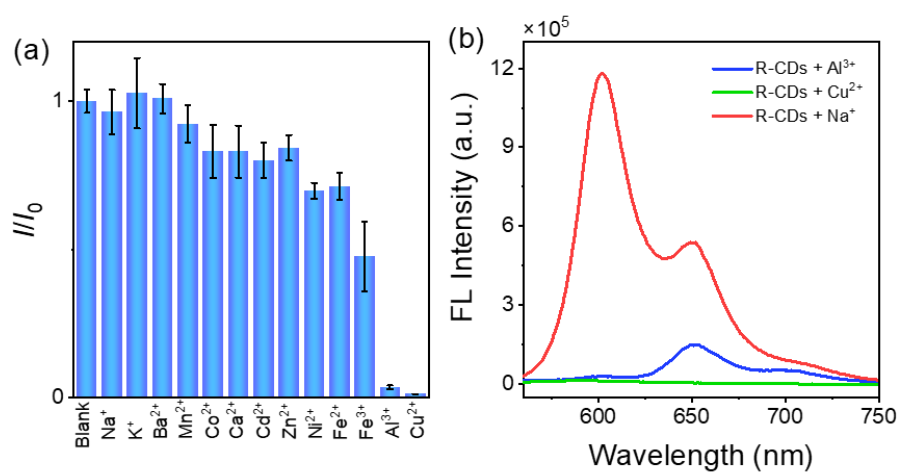

**Fig. S4** FL intensity of R-CDs at 601 nm stimulated by various metal ions.

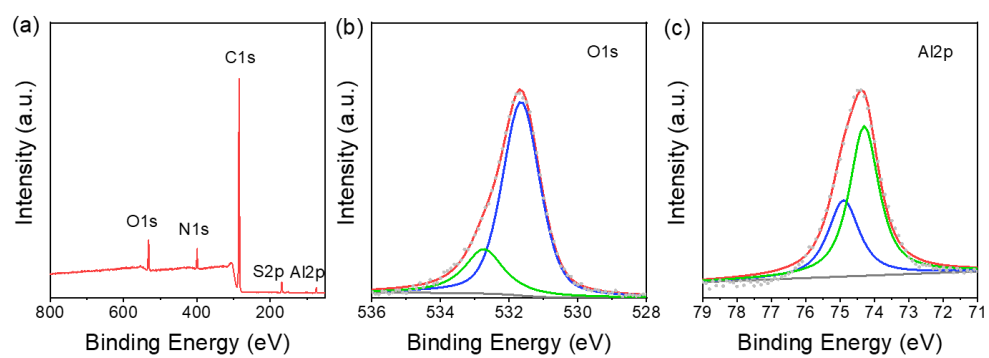

**Fig. S5** (a) XPS survey spectra, high-resolution (b) O 1s XPS spectra, (c) Al 2p XPS spectra spectra of  $\text{Al}^{3+}$ -R-CDs.

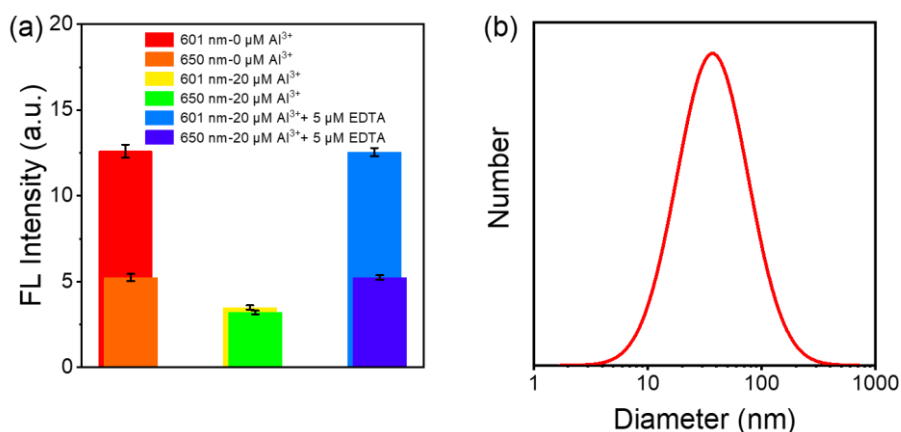

**Fig. S6** (a) Changes in peak intensity in 0  $\mu\text{M Al}^{3+}$ , 20  $\mu\text{M Al}^{3+}$ , and 20  $\mu\text{M Al}^{3+}$  + 5  $\mu\text{M EDTA}$ . (b) Size distribution of  $\text{Al}^{3+}$ -R-CDs from DLS.

As shown in Fig. S6a, the addition of ethylenediaminetetraacetic acid (EDTA) can effectively inhibit the quenching effect of  $\text{Al}^{3+}$  on R-CDs, which indicates the quenching behavior is barely affected by common chelating interference. Meanwhile, the DLS tests (Fig. S6b) revealed that the diameter of  $\text{Al}^{3+}$ -R-CDs in an ethanol solution was approximately 36 nm, indicate that  $\text{Al}^{3+}$  introduction only induces slight and negligible variation in particle size and aggregation state of the materials, excluding prominent aggregation-derived quenching effects. Considering that the addition of  $\text{Al}^{3+}$  alters the solution's pH and polarity in a manner analogous to direct acid introduction. As shown in Fig. S7b, in contrast to the fluorescence alterations induced by  $\text{Al}^{3+}$ , variations in pH and solvent can lead to shifts in the position of the fluorescence peak. Combined with consistent spectral characterization results, the coordination interaction between  $\text{Al}^{3+}$  and carboxyl/carbonyl groups is still the dominant mechanism for the selective fluorescence quenching.

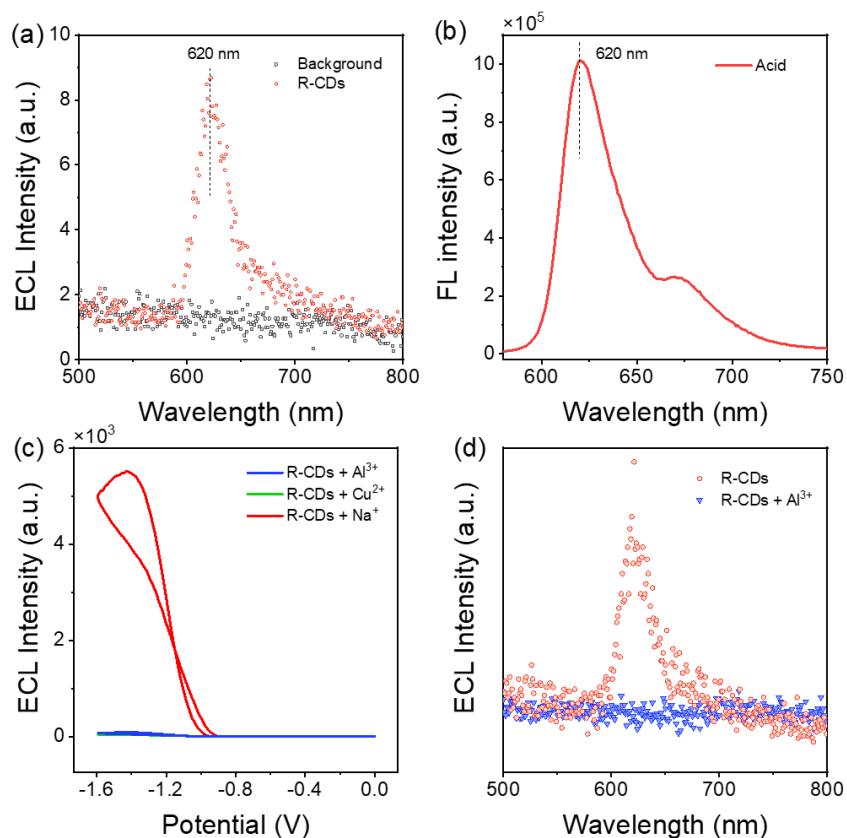

**Fig. S7** (a) ECL spectrum and (b) FL spectrum of R-CDs in Ethanol/PBS and acid solution, respectively. (c) ECL response curves of R-CDs to  $\text{Na}^+$ ,  $\text{Cu}^{2+}$  and  $\text{Al}^{3+}$ . (d) ECL spectrum of R-CDs with and without of  $\text{Al}^{3+}$ .

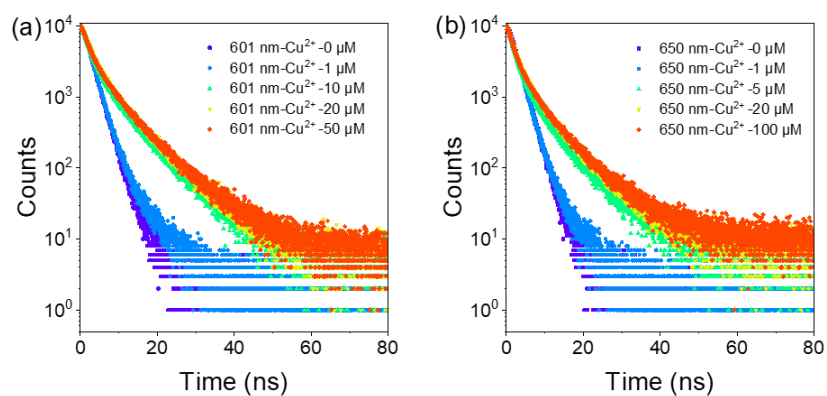

**Fig. S8** Time-resolved photoluminescence decay of R-CDs with with Cu<sup>2+</sup> at (a) 601 nm and (b) 650 nm.

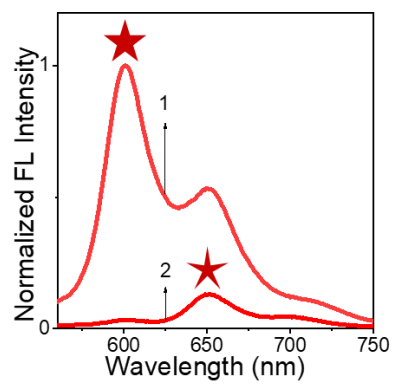

**Fig. S9** After immersing the above tags in solutions, the solutions observed with fluorescence spectrometer.

**Table 1** Time resolved decay parameters for R-CDs with different concentrations of ions. ( $\lambda_{\text{ex}} = 460 \text{ nm}$ )

|           | $\tau_{\text{average}} / \text{ns}$ | $\tau_1 / \text{ns}$ | $\tau_2 / \text{ns}$ | $\tau_3 / \text{ns}$ |
|-----------|-------------------------------------|----------------------|----------------------|----------------------|
| 601-Cu-0  | 1.445                               | 1.994                | 4.069                | 0.713                |
| 601-Cu-1  | 1.468                               | 2.051                | 5.773                | 0.688                |
| 601-Cu-10 | 2.058                               | 2.154                | 0.355                | 7.515                |
| 601-Cu-20 | 2.235                               | 2.320                | 0.416                | 7.731                |
| 601-Cu-50 | 2.171                               | 2.203                | 0.439                | 7.818                |
| 650-Cu-0  | 1.431                               | 1.933                | 3.217                | 0.724                |
| 650-Cu-1  | 1.430                               | 1.982                | 4.553                | 0.692                |
| 650-Cu-10 | 1.605                               | 1.795                | 0.341                | 6.969                |
| 650-Cu-20 | 1.848                               | 1.973                | 0.365                | 7.274                |
| 650-Cu-50 | 1.805                               | 1.880                | 0.398                | 7.296                |
| 601-Al-0  | 1.445                               | 1.994                | 4.069                | 0.713                |
| 601-Al-1  | 1.457                               | 2.015                | 5.628                | 0.706                |
| 601-Al-10 | 1.709                               | 2.131                | 0.557                | 7.383                |
| 601-Al-20 | 1.877                               | 2.016                | 0.513                | 7.235                |
| 601-Al-50 | 1.784                               | 1.905                | 0.525                | 7.027                |
| 650-Al-0  | 1.431                               | 1.933                | 3.217                | 0.724                |
| 650-Al-1  | 1.233                               | 1.613                | 3.594                | 0.654                |
| 650-Al-10 | 0.937                               | 1.111                | 5.110                | 0.718                |
| 650-Al-20 | 0.906                               | 1.013                | 5.426                | 0.773                |
| 650-Al-50 | 0.886                               | 0.951                | 5.383                | 0.808                |

The fluorescence decay curves are fitted with tri-exponential functions, indicating the coexistence of multiple emissive centers in R-CDs. The three lifetime components  $\tau_1$ ,  $\tau_2$ , and  $\tau_3$  can be correspondingly attributed to intrinsic core states, low-energy surface defect states, and emissive sites related to surface functional groups, which are closely related to the generation of the main fluorescence peak.
